# Supplementary material
Source: PubMed Central journal article supplement (PMC7933496)
Supplement: NIHMS1669676-supplement-1.pdf [file NIHMS1669676-supplement-1.pdf]

Supplemental Table 1: Sensitivity analysis, medication use (defined as 2 or more visits where medication was used) and risk of clinically-detected atrial fibrillation in longitudinal analyses

| Opioid use                |                                      | Gabapentinoid use         |                                      | NSAID use                 |                                      |
|---------------------------|--------------------------------------|---------------------------|--------------------------------------|---------------------------|--------------------------------------|
| Unadjusted HR<br>(95% CI) | Adjusted HR <sup>a</sup><br>(95% CI) | Unadjusted HR<br>(95% CI) | Adjusted HR <sup>a</sup><br>(95% CI) | Unadjusted HR<br>(95% CI) | Adjusted HR <sup>a</sup><br>(95% CI) |
| 1.16 (0.77, 1.74)         | 1.10 (0.73, 1.66)                    | 1.10 (0.60, 2.00)         | 1.07 (0.69, 1.66)                    | 0.88 (0.72-1.06)          | 1.02 (0.84-1.25)                     |

<sup>a</sup>Adjusted for: age, sex, site, race, height, weight, diabetes, treated hypertension, systolic blood pressure, smoking, alcohol use.  
Abbreviations: NSAID, non-steroidal anti-inflammatory drug; HR, hazard ratio; CI, confidence interval.

Supplemental Table 2: Sensitivity analysis, most common types of specific opioid and gabapentinoid medication use and risk of clinically-detected atrial fibrillation in longitudinal analyses

| Hydrocodone use           |                                      | Tramadol use              |                                      | Gabapentin use            |                                      |
|---------------------------|--------------------------------------|---------------------------|--------------------------------------|---------------------------|--------------------------------------|
| Unadjusted HR<br>(95% CI) | Adjusted HR <sup>a</sup><br>(95% CI) | Unadjusted HR<br>(95% CI) | Adjusted HR <sup>a</sup><br>(95% CI) | Unadjusted HR<br>(95% CI) | Adjusted HR <sup>a</sup><br>(95% CI) |
| 0.87 (0.49, 1.54)         | 0.84 (0.48, 1.49)                    | 1.26 (0.76, 2.11)         | 1.04 (0.62, 1.74)                    | 1.28 (0.80, 2.04)         | 1.08 (0.67, 1.72)                    |

<sup>a</sup>Adjusted for: age, sex, site, race, height, weight, diabetes, treated hypertension, systolic blood pressure, smoking, alcohol use.  
Abbreviations: HR, hazard ratio; CI, confidence interval.

Supplemental Table 3: Cross-sectional associations between medication use and the incidence of monitor-detected supraventricular tachycardia, Multi-Ethnic Study of Atherosclerosis Exam 6

|                              | Opioid                 |                                   | Gabapentinoid          |                                   | NSAID                  |                                   |
|------------------------------|------------------------|-----------------------------------|------------------------|-----------------------------------|------------------------|-----------------------------------|
|                              | Unadjusted<br>(95% CI) | Adjusted <sup>a</sup><br>(95% CI) | Unadjusted<br>(95% CI) | Adjusted <sup>a</sup><br>(95% CI) | Unadjusted<br>(95% CI) | Adjusted <sup>a</sup><br>(95% CI) |
| Incidence of SVT, rate ratio | 1.18 (0.81, 1.71)      | 1.17 (0.81, 1.69)                 | 1.38 (1.00, 1.90)      | 1.41 (1.02, 1.97)                 | 1.04 (0.82, 1.32)      | 0.96 (0.74, 1.23)                 |

<sup>a</sup>Adjusted for: age, sex, site, race, height, weight, diabetes, treated hypertension, systolic blood pressure, smoking, alcohol use, history of myocardial infarction, stroke and heart failure, physical activity, self-reported health, and self-reported pain interfering with work.  
Abbreviations: NSAID, non-steroidal anti-inflammatory drug; SVT, supraventricular tachycardia; CI, confidence interval.
